# Supplementary material
Source: PubMed Central journal article supplement (PMC3689960)
Supplement: supp_M112.407296_jbc.M112.407296-2.pdf [file supp_M112.407296_jbc.M112.407296-2.pdf]

**Table 1 The differentially expressed proteins in mandibular chondrocytes undercompressive mechanical stress loading**

<sup>a</sup> Mowse score, for a significant ( $p < 0.05$ ) positive protein identification, cut-off threshold was 59.

| Spot                                       | Accession NO | Protein name                                            | Score <sup>a</sup> | MW/PI       | Sequence coverage | Peptides <sup>b</sup> | Control/ Stress Ratio <sup>c</sup> | p-value  |
|--------------------------------------------|--------------|---------------------------------------------------------|--------------------|-------------|-------------------|-----------------------|------------------------------------|----------|
| Endoplasmic reticulum molecular chaperones |              |                                                         |                    |             |                   |                       |                                    |          |
| P1                                         | IPI00198887  | Protein disulfide-isomerase precursor                   | 222                | 57315/4.82  | 37%               | 24                    | 1:3.924                            | 3.39E-05 |
| P4                                         | IPI00191728  | Calreticulin precursor                                  | 113                | 48137/4.33  | 30%               | 13                    | 1:4.718                            | 2.01E-05 |
| P5                                         | IPI00192912  | Reticulocalbin-1 precursor                              | 81                 | 38067/4.67  | 33%               | 14                    | 1:2.010                            | 8.22E-05 |
| Stress-related protein                     |              |                                                         |                    |             |                   |                       |                                    |          |
| 7                                          | IPI00201586  | Heat shock protein beta-1                               | 92                 | 22936/6.1   | 31%               | 20                    | 1:2.171                            | 7.13E-05 |
| Cytoskeleton-related proteins              |              |                                                         |                    |             |                   |                       |                                    |          |
| 2                                          | IPI00214905  | Tropomyosin alpha-4 chain                               | 113                | 28549/4.66  | 47%               | 16                    | 1:0.141                            | 2.96E-07 |
| 3                                          | IPI00214905  | Tropomyosin alpha-4 chain                               | 121                | 28549/4.66  | 39%               | 19                    | 1:0.194                            | 1.39E-06 |
| P8                                         | IPI00656387  | Capping protein (actin filament) muscle Z-line, alpha 3 | 76                 | 34981/6.11  | 40%               | 20                    | 1:0.461                            | 2.46E-04 |
| P7                                         | IPI00765011  | Actin cytoplasmic 2                                     | 95                 | 59163/5.67  | 31%               | 16                    | 1:0.245                            | 8.17E-04 |
| Cell cycle protein                         |              |                                                         |                    |             |                   |                       |                                    |          |
| P12                                        | IPI00208306  | Translationally-controlled tumor protein                | 79                 | 19564/4.76  | 34%               | 10                    | 1:0.105                            | 5.05E-05 |
| 11                                         | IPI00187707  | Peptidyl-prolyl cis-trans isomerase                     | 287                | 23052/7.85  | 62%               | 27                    | 1:0.107                            | 2.85E-05 |
| P14                                        | IPI00560544  | Retinoblastoma binding protein 6 isoform 1              | 62                 | 196422/9.62 | 15%               | 27                    | 1:0.219                            | 3.49E-05 |
| Signal transduction protein                |              |                                                         |                    |             |                   |                       |                                    |          |
| 4                                          | IPI00231615  | Anxa1 44 kDa protein                                    | 150                | 43907/6.97  | 50%               | 20                    | 1:2.944                            | 2.15E-04 |
| P3                                         | IPI00360030  | G protein-regulated inducer of neurite outgrowth        | 246                | 94055/6.20  | 22%               | 28                    | 1:0.382                            | 8.63E-05 |
| Glycolytic enzymes                         |              |                                                         |                    |             |                   |                       |                                    |          |
| 1                                          | IPI00764301  | Isoform M2 of Pyruvate kinase isozymes                  | 289                | 58472/7.15  | 58%               | 36                    | 1:0.267                            | 2.24E-04 |
| 5                                          | IPI00555252  | Glyceraldehyde-3-phosphate dehydrogenase                | 166                | 36090/8.14  | 56%               | 20                    | 1:0.287                            | 8.20E-06 |
| P9                                         | IPI00191707  | Pyruvate dehydrogenase E1 component alpha subunit       | 90                 | 43883/8.49  | 40%               | 33                    | 1:0.242                            | 4.33E-05 |
| Oxidant enzymes                            |              |                                                         |                    |             |                   |                       |                                    |          |
| 8                                          | IPI00768953  | Cytochrome c oxidase                                    | 116                | 14849/8.35  | 67%               | 15                    | 1:0.226                            | 1.83E-05 |
| 9                                          | IPI00231643  | Superoxide dismutase                                    | 169                | 16073/5.88  | 62%               | 12                    | 1:2.172                            | 8.54E-06 |
| Antioxidant enzymes                        |              |                                                         |                    |             |                   |                       |                                    |          |
| P2                                         | IPI00231737  | Aldose reductase                                        | 78                 | 36230/6.26  | 46%               | 18                    | 1:0.454                            | 1.17E-03 |
| Membrane protein                           |              |                                                         |                    |             |                   |                       |                                    |          |
| 6                                          | IPI00200117  | Syndecan binding protein Syntenin-1                     | 73                 | 32631/7.05  | 28%               | 12                    | 1:2.160                            | 2.52E-04 |
| DNA combination protein                    |              |                                                         |                    |             |                   |                       |                                    |          |
| P6                                         | IPI00767551  | Zinc finger protein 69                                  | 102                | 66981/8.32  | 23%               | 16                    | 1:2.137                            | 3.80E-02 |
| Protein degradation                        |              |                                                         |                    |             |                   |                       |                                    |          |
| P10                                        | IPI00191501  | Proteasome subunit alpha type 6                         | 104                | 27838/6.34  | 50%               | 14                    | 1:3.916                            | 1.36E-05 |
| P11                                        | IPI00231757  | Proteasome subunit alpha type 2                         | 91                 | 26024/6.92  | 37%               | 8                     | 1:5.804                            | 6.63E-04 |
| Unclassified                               |              |                                                         |                    |             |                   |                       |                                    |          |
| 10                                         | IPI00782427  | 38 kDa protein                                          | 119                | 37861/4.72  | 45%               | 15                    | 1:5.120                            | 2.64E-05 |
| P13                                        | IPI00767397  | Sjogren syndrome antigen B                              | 293                | 46655/9.65  | 42%               | 29                    | 1:2.143                            | 1.12E-04 |

<sup>b</sup> Number of peptides matched to the protein sequence.

<sup>c</sup> Ratio represents fold-change of Stress group relative to the control group.
